# Supplementary material for: Therapeutic Effect of an Antibody-Derived Peptide in a Galleria mellonella Model of Systemic Candidiasis
Source: MDPI journal article supplement (doi:10.3390/ijms222010904), 2021-10-09
Supplement: s1 [file s1]

# Therapeutic Effect of an Antibody-Derived Peptide in a *Galleria mellonella* Model of Systemic Candidiasis

Emerenziana Ottaviano <sup>1</sup>, Elisa Borghi <sup>1</sup>, Laura Giovati <sup>2</sup>, Monica Falleni <sup>1</sup>, Delfina Tosi <sup>1</sup>, Walter Magliani <sup>2</sup>, Giulia Morace <sup>1</sup>, Stefania Conti <sup>2,\*</sup> and Tecla Ciociola <sup>2</sup>

<sup>1</sup> Department of Health Sciences, University of Milan, 20142 Milan, Italy; emerenziana.ottaviano@unimi.it (E.O.); elisa.borghi@unimi.it (E.B.); monica.falleni@unimi.it (M.F.); delfina.tosi@unimi.it (D.T.); giulia.morace@unipr.it (G.M.)

<sup>2</sup> Department of Medicine and Surgery, University of Parma, 43126 Parma, Italy; laura.giovati@unipr.it (L.G.); walter.magliani@unipr.it (W.M.); tecla.ciociola@unipr.it (T.C.)

\* Correspondence: stefania.conti@unipr.it; Tel.: +390521903492

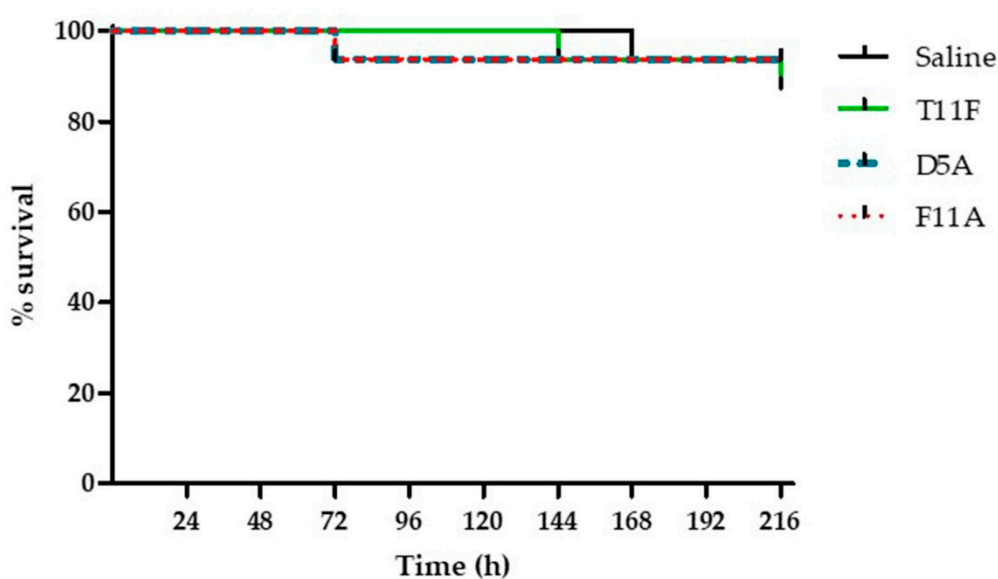

**Figure S1.** Peptides' toxicity in *Galleria mellonella* larvae. Larvae were inoculated with peptides (15  $\mu$ mol/kg, single injection 10  $\mu$ l) or saline (control group). The survival curves of treated larvae were not significantly different from that of control group, as assessed by Mantel-Cox log-rank test.

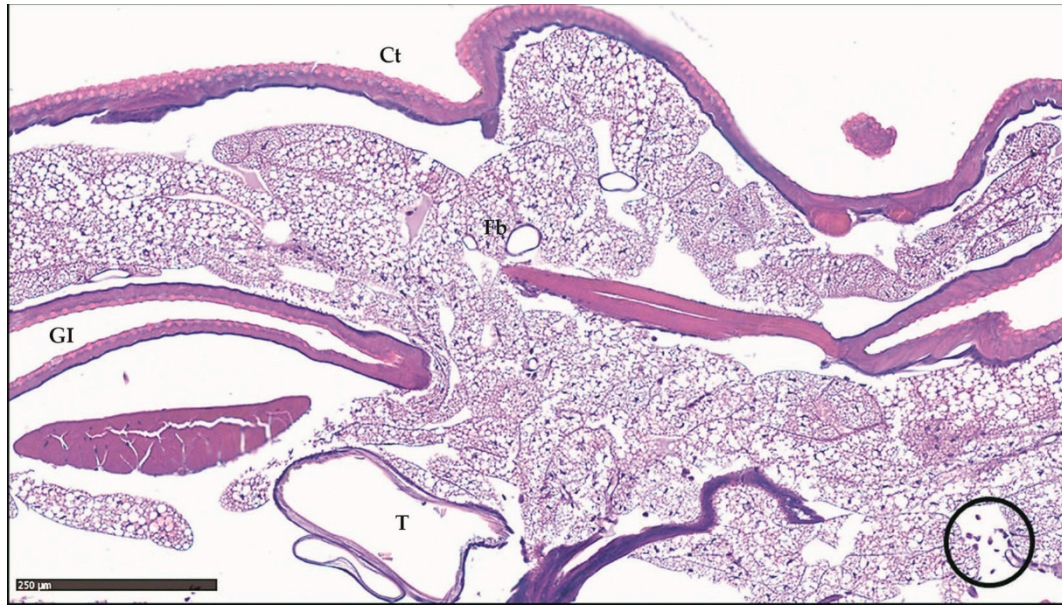

**Figure S2.** Histology of an untouched *Galleria mellonella* larva. Larval tissues are well preserved and only a few hemocytes can be observed in the hemolymph near the fat body (circle). Ct: cuticle; Fb: fat body; GI: gastrointestinal tract; T: trachea. Bar = 250 μm.
